# Supplementary material for: A novel NF2 splicing mutant causes neurofibromatosis type 2 via liquid-liquid phase separation with large tumor suppressor and Hippo pathway
Source: PubMed Central journal article supplement — iScience. 2022 Oct 4;25(11):105275. doi: 10.1016/j.isci.2022.105275 (PMC9589172; doi:10.1016/j.isci.2022.105275), 2022-10-04
Supplement: mmc1.pdf [file mmc1.pdf]

**Supplemental information**

**A novel NF2 splicing mutant causes neurofibromatosis**

**type 2 via liquid-liquid phase separation**

**with large tumor suppressor and Hippo pathway**

**Zexiao Jia, Shuxu Yang, Mengyao Li, Zhaoying Lei, Xue Ding, Mingjie Fan, Dixian Wang, Dajiang Xie, Hui Zhou, Yue Qiu, Qianqian Zhuang, Dan Li, Wei Yang, Xuchen Qi, Xiaohui Cang, Jing-Wei Zhao, Wenqi Wang, Aifu Lin, and Qingfeng Yan**

## Supplemental Items

|                                |              | p. 257-261 |             |
|--------------------------------|--------------|------------|-------------|
| <i>Homo sapiens</i>            | ENRLTPK I SF | PWNEI      | RNI SYSDKEF |
| <i>Pongo abelii</i>            | ENRLTPK I SF | PWNEI      | RNI SYSDKEF |
| <i>Pan paniscus</i>            | ENRLTPK I SF | PWNEI      | RNI SYSDKEF |
| <i>Pan troglodytes</i>         | ENRLTPK I SF | PWNEI      | RNI SYSDKEF |
| <i>Gorilla gorilla</i>         | ENRLTPK I SF | PWNEI      | RNI SYSDKEF |
| <i>Carlito syrichta</i>        | ENRLTPK I SF | PWNEI      | RNI SYSDKEF |
| <i>Macaca mulatta</i>          | ENRLTPK I SF | PWNEI      | RNI SYSDKEF |
| <i>Bos Taurus</i>              | ENRLTPK I SF | PWNEI      | RNI SYSDKEF |
| <i>Sus scrofa</i>              | ENRLTPK I SF | PWNEI      | RNI SYSDKEF |
| <i>Rattus norvegicus</i>       | ENRLTPK I SF | PWNEI      | RNI SYSDKEF |
| <i>Mus musculus</i>            | ENRLTPK I SF | PWNEI      | RNI SYSDKEF |
| <i>Danio rerio</i>             | ENRLTPKTSF   | PWNEI      | RNI SYSDKEF |
| <i>Xenopus laevis</i>          | NNKLSPNKSF   | PWSGI      | RNI SYSEKEF |
| <i>Drosophila melanogaster</i> | RDKLTPKTTF   | QWNEI      | RHVSFDDKKF  |
| <i>Caenorhabditis elegans</i>  | VNRITPRPFF   | SWSEI      | KNIQFKNRKF  |

**Figure S1. Sequence alignment of NF2 protein in 15 organisms, related to Figure 1D-1F.** The red box shows the deleted section of the NF2 protein. The green box indicates the five amino acid deletion in p.257-261.

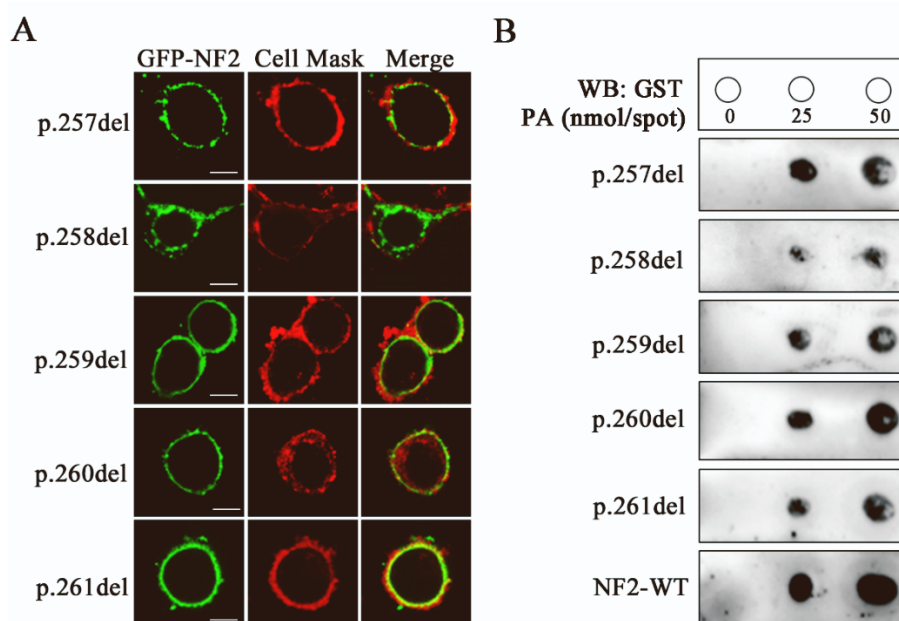

**Figure S2. Effect of single amino acid residue deletion of NF2 at p.257-261 (Pro-Trp-Asn-Glu-Ile, respectively) on subcellular localization, related to Figure 2A and 2B.** (A) HEK293T cells transfected with pEGFP-NF2-mut (p.257del, p.258del, p.259del, p.260del, p.261del) were labeled with CellMask™ plasma membrane stains. Fixed cells were immunostained as indicated. Scale Bar: 10µm. (B) Single amino acid residue deletion NF2 variant interact with PA. The purified NF2-mut (p.257del, p.258del, p.259del, p.260del, p.261del) proteins (0.5µg/mL) were subjected to the lipid dot-blot assay.

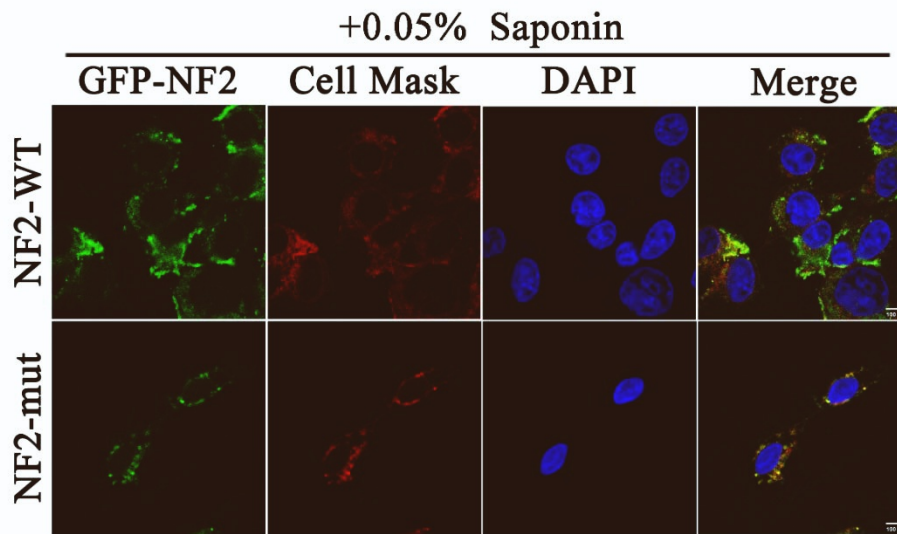

**Figure S3. Effect of saponin treatment on NF2 puncta, related to Figure 2D.** HEK293T HEK293T cells transfected with pEGFP-NF2-WT or pEGFP-NF2-mut were permeabilized with 0.05% saponin and analyzed by confocal microscopy.

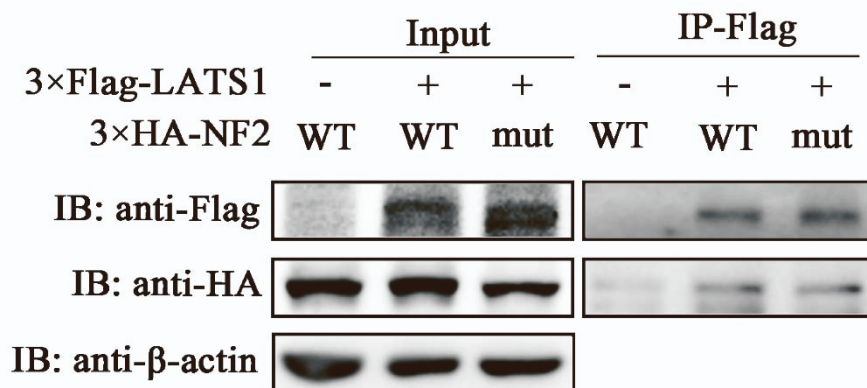

**Figure S4. Co-IP assay on the interaction of LATS with NF2, related to Figure 3A.** HEK293T cells transfected with p3×Flag-LATS1 and p3×HA-NF2 were immunoprecipitated with anti-Flag and immunoblotted as indicated.

**Table S1. MD simulation systems in this study, related to Figure 1G-1M.**

| system        | residues included        | Initial size of the simulation box | total atoms | simulation time (ns) |
|---------------|--------------------------|------------------------------------|-------------|----------------------|
| wild-FERM     | 20-313                   | 8.5×8.5×8.5 nm <sup>3</sup>        | 61066       | 200                  |
| mutant-FERM   | 20-256, 262-313          | 8.5×8.5×8.5 nm <sup>3</sup>        | 61026       | 200                  |
| Wild-Merlin   | 20-380, 459-595          | 9.3×9.3×9.3 nm <sup>3</sup>        | 81037       | 200                  |
| Mutant-Merlin | 20-256, 262-380, 459-595 | 9.3×9.3×9.3 nm <sup>3</sup>        | 80953       | 200                  |
